# Supplementary material for: Surface treatment with Al3+on a Ti-doped α-Fe2O3nanorod array photoanode for efficient photoelectrochemical water splitting
Source: Royal Society of Chemistry journal article supplement (doi:10.1039/c4ta02527j), 2014-06-19
Supplement: c4ta02527j1.pdf [file c4ta02527j1.pdf]

## Supporting Information

### Surface treatment with $\text{Al}^{3+}$ on Ti-doped $\alpha\text{-Fe}_2\text{O}_3$ nanorod arrays photoanode for efficient photoelectrochemical water splitting

Zewen Fu<sup>a</sup>, Tengfei Jiang<sup>a</sup>, Lijing Zhang<sup>a</sup>, Bingkun Liu<sup>a</sup>, Dejun Wang<sup>a,c</sup>, Lingling Wang<sup>\*,b</sup> and Tengfeng Xie<sup>\*,a</sup>.

<sup>a</sup> State Key Laboratory of Theoretical and Computational Chemistry, College of Chemistry, Jilin University, Changchun 130012, People's Republic of China.

<sup>b</sup> State Key Laboratory of Supramolecular structure and materials, College of Chemistry, Jilin University, Changchun 130012, People's Republic of China.

<sup>c</sup> Department of Chemistry, Tsinghua University, Beijing 100084, People's Republic of China.

\*Corresponding author. Tel.: +86 431 85168093. E-mail: xietf@jlu.edu.cn and ltlwl198003082@aliyan.com.

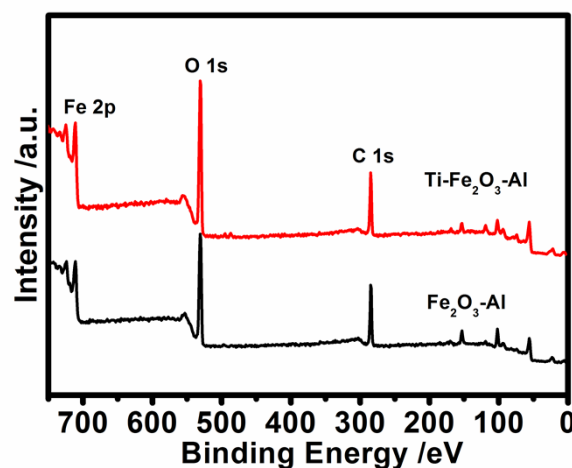

Fig. S1 XPS survey spectra of  $\text{Fe}_2\text{O}_3\text{-Al}$  and  $\text{Ti-Fe}_2\text{O}_3\text{-Al}$ .

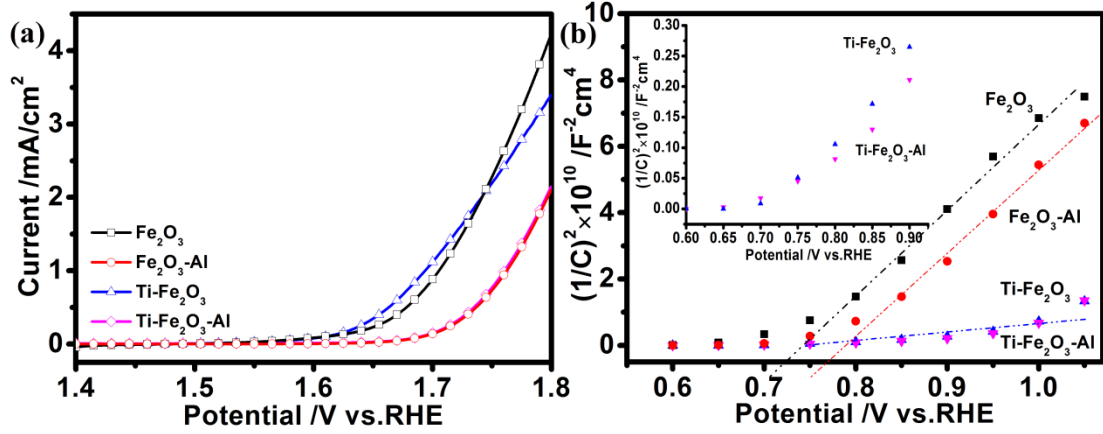

**Fig. S2** Dark current for water oxidation (a) and Mott-Schottly plots (b) of Fe<sub>2</sub>O<sub>3</sub>, Fe<sub>2</sub>O<sub>3</sub>-Al, Ti-Fe<sub>2</sub>O<sub>3</sub> and Ti-Fe<sub>2</sub>O<sub>3</sub>-Al.

The onset potential of dark current can provide information as to electrocatalytic activity of water oxidation on the Fe<sub>2</sub>O<sub>3</sub> electrode.<sup>1</sup> Compared with Fe<sub>2</sub>O<sub>3</sub> and Ti-Fe<sub>2</sub>O<sub>3</sub>, the dark onset potential of Fe<sub>2</sub>O<sub>3</sub>-Al and Ti-Fe<sub>2</sub>O<sub>3</sub>-Al shows an anodic shift. In general, a lower dark current onset potential indicates higher electrocatalytic activity for water oxidation.<sup>2</sup> This indicates that the surface treatment with Al<sup>3+</sup> makes the electrode less catalytic for O<sub>2</sub> evolution. The donor concentration ( $N_d$ ) and flat band potential ( $V_{fb}$ ) can be quantified by the Mott-Schottky equation.<sup>3</sup>

$$1/C^2 = (2/e\epsilon_0\epsilon N_d)[(V - V_{fb}) - kT/e]$$

Where the  $C$  is the capacitance of the space charge region,  $\epsilon_0$  is the vacuum permittivity,  $\epsilon$  is the dielectric constant of  $\alpha$ -Fe<sub>2</sub>O<sub>3</sub>,  $e$  is the electron charge,  $V$  is the electrode applied potential,  $k$  is the Boltzmann constant,  $T$  is the absolute temperature, and  $N_d$  is the donor concentration. In general, the impact of temperature term is small and can be neglected. All samples show a positive slope in the Mott-Schottky plots, indicating that they are n-type semiconductors. The donor concentration is calculated with the equation.<sup>4, 5</sup>

$$N_d = (2/e\epsilon\epsilon_0)[d(1/C^2)/dV]^{-1}$$

With the  $\epsilon$  value of 80 for  $\alpha$ -Fe<sub>2</sub>O<sub>3</sub>,<sup>6</sup> the  $N_d$  of Fe<sub>2</sub>O<sub>3</sub> and Fe<sub>2</sub>O<sub>3</sub>-Al were calculated to be  $2.1 \times 10^{18} \text{ cm}^{-3}$ . The  $N_d$  of Ti-Fe<sub>2</sub>O<sub>3</sub> and Ti-Fe<sub>2</sub>O<sub>3</sub>-Al were calculated to be  $1.7 \times 10^{20} \text{ cm}^{-3}$ .

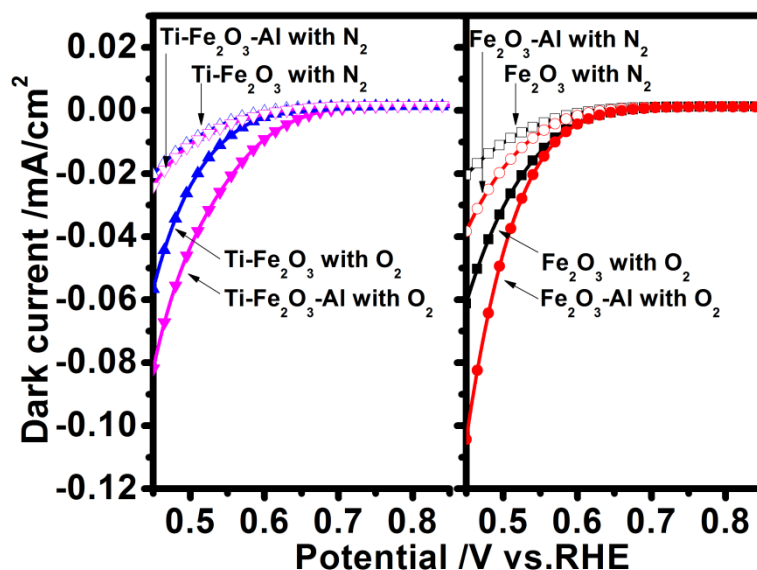

**Fig. S3** Reduction dark current curves of  $\text{Fe}_2\text{O}_3$ ,  $\text{Fe}_2\text{O}_3\text{-Al}$ ,  $\text{Ti-Fe}_2\text{O}_3$  and  $\text{Ti-Fe}_2\text{O}_3\text{-Al}$ , in 1 M NaOH solution with different gas bubbling ( $\text{N}_2$  or  $\text{O}_2$ ).

As shown in the Fig. S3, the dark current of  $\text{Ti-Fe}_2\text{O}_3$  and  $\text{Ti-Fe}_2\text{O}_3\text{-Al}$  are negligible with  $\text{N}_2$  bubbling. When  $\text{O}_2$  was bubbling into the solution, an obvious reduction current was observed for  $\text{Ti-Fe}_2\text{O}_3$  and  $\text{Ti-Fe}_2\text{O}_3\text{-Al}$ . The reduction current represents the electrons of  $\text{Fe}_2\text{O}_3$  reduce  $\text{O}_2$ . Compared with  $\text{Ti-Fe}_2\text{O}_3$ , the  $\text{Ti-Fe}_2\text{O}_3\text{-Al}$  has a higher reduction current when  $\text{O}_2$  was bubbling into solution. The same result can be seen on  $\text{Fe}_2\text{O}_3$  and  $\text{Fe}_2\text{O}_3\text{-Al}$ . When  $\text{O}_2$  was bubbling into the solution,  $\text{Fe}_2\text{O}_3\text{-Al}$  has a higher reduction current than  $\text{Fe}_2\text{O}_3$ . The results suggest that  $\text{O}_2$  is reduced more easily on  $\text{Fe}_2\text{O}_3\text{-Al}$  and  $\text{Ti-Fe}_2\text{O}_3\text{-Al}$  compared with  $\text{Fe}_2\text{O}_3$  and  $\text{Ti-Fe}_2\text{O}_3$ .

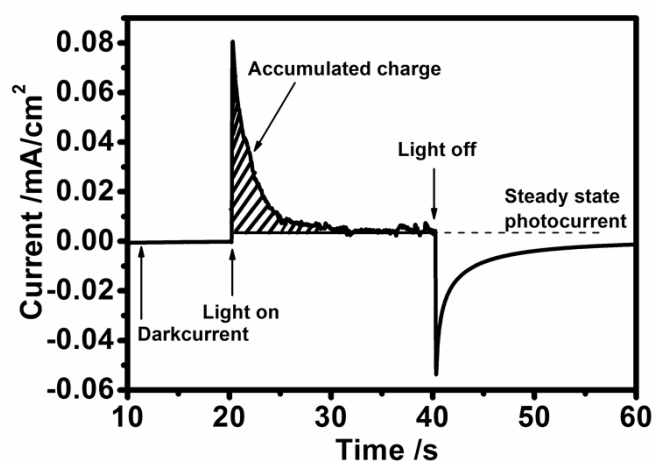

**Fig. S4** The transient photocurrent of  $\text{Fe}_2\text{O}_3$  at  $1.5 V_{\text{RHE}}$ . 1 M NaOH,  $100 \text{ mW/cm}^2$ .

## References

1. D. Cao, W. Luo, J. Feng, X. Zhao, Z. Li and Z. Zou, *Energy Environ Sci*, 2014, 7, 752.
2. R. L. Spray, K. J. McDonald and K.-S. Choi, *J Phys Chem C*, 2011, 115, 3497-3506.
3. N. T. Hahn and C. B. Mullins, *Chem Mater*, 2010, 22, 6474-6482.

4. T. Jiang, T. Xie, L. Chen, Z. Fu and D. Wang, *Nanoscale*, 2013, 5, 2938.
5. G. Wang, Y. Ling, D. A. Wheeler, K. E. N. George, K. Horsley, C. Heske, J. Z. Zhang and Y. Li, *Nano Lett.*, 2011, 11, 3503-3509.
6. F. Le Formal, N. Tetreault, M. Cornuz, T. Moehl, M. Gratzel and K. Sivula, *Chem Sci*, 2011, 2, 737-743.
